# Supplementary material for: Clinical effects with customized brackets and CAD/CAM technology: a prospective controlled study
Source: PubMed Central journal article supplement (PMC8645527; doi:10.1186/s40510-021-00386-0), 2021-12-06

## CONSORT 2010 Flow Diagram

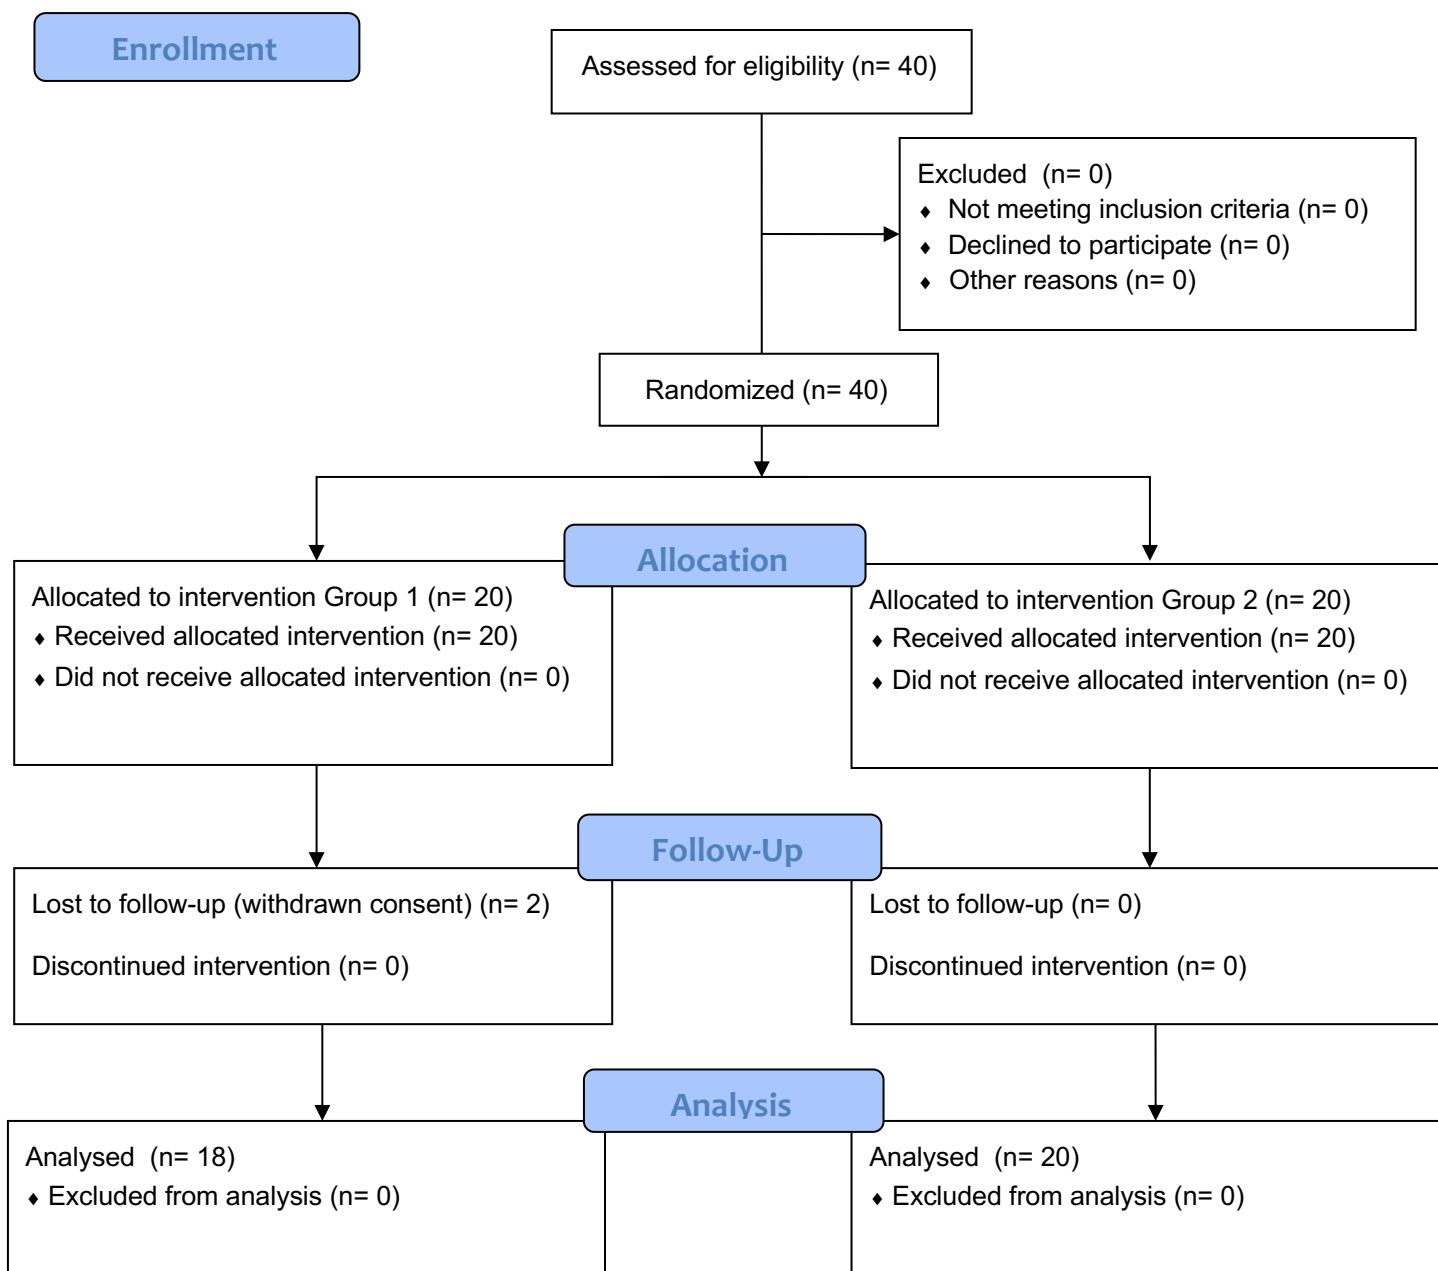

Supplement: 40510_2021_386_MOESM1_ESM.pdf [file 40510_2021_386_MOESM1_ESM.pdf]
